**Title:** Admissions for eating disorders and other mental health diagnoses during the COVID-19 pandemic

**Authors:** Sydney C. Jones, BS<sup>1\*</sup>, Megan Jacobs, MD<sup>2\*</sup>, Emile Latour, MS<sup>3</sup>, Rebecca Marshall MD, MPH<sup>4</sup>, Michelle Noelck, MD<sup>2</sup>, Byron A. Foster, MD, MPH<sup>2,5</sup>

\* Indicates co first-authorship

**Affiliations:**

<sup>1</sup> School of Medicine, Oregon Health & Science University  
2730 SW Moody Avenue Portland, OR 97201 U.S.

[jonessy@ohsu.edu](mailto:jonessy@ohsu.edu)

<sup>2</sup> Department of Pediatrics, Oregon Health & Science University  
707 SW Gaines St CDRC Portland, OR 97239 U.S.

[jacobsm@ohsu.edu](mailto:jacobsm@ohsu.edu), [noelck@ohsu.edu](mailto:noelck@ohsu.edu), [fosterb@ohsu.edu](mailto:fosterb@ohsu.edu)

<sup>3</sup> Biostatistics Shared Resource, Knight Cancer Institute, Oregon Health & Science University  
2720 SW Moody Ave, Portland, OR 97201 U.S.

[latour@ohsu.edu](mailto:latour@ohsu.edu)

<sup>4</sup> Department of Psychiatry, Oregon Health & Science University

3181 SW Sam Jackson Park Rd Portland, OR 97239 Multnomah Pavilion, Room 2316 U. S.

[marshare@ohsu.edu](mailto:marshare@ohsu.edu)

<sup>5</sup> OHSU-PSU School of Public Health

3181 SW Sam Jackson Park Road Portland, OR 97239 U.S.

**Source of Funding:** This work was supported by Oregon Health & Science University institutional funding.

**Acknowledgment:** Jose Rodriguez extracted multiple iterations of the data from the medical records.

**Conflict of Interest:** Dr. Jacobs, Dr. Foster, Dr. Marshall, Dr. Noelck, Mr. Latour, and Ms. Jones have no conflicts of interest to disclose.

**Key Words:**

COVID-19, Pediatrics, Adolescent, Feeding and Eating Disorders, Mental Health, Stay at Home Orders

**Abstract:**

**Objective:** To examine how hospital admissions for mental health and eating disorders changed at the beginning of the COVID-19 pandemic and with the return to fully in-person school with increased vaccine availability.

**Methods:** Data from a tertiary care children's hospital were examined for admissions to the hospital from March 2018 through March 2022, including children 6-20 years old admitted with ICD-10 codes for mental health and eating disorders. Interrupted time series (ITS) analyses were used to examine for changes at specific time points.

**Results:** In the time between March 2018 through March 2022, 851 admissions met inclusion criteria for eating disorders and 1,505 admissions for other mental health diagnoses. In the first year of the pandemic, the ITS analysis showed a significant increase in admissions per month for eating disorders with a slope of 1.2 (95% CI: 0.2, 2.2) and for other mental health diagnoses, a slope of 1.9 (95% CI: 1.1, 2.7). In a longer-term ITS analysis, return to fully in-person school was associated with a subsequent decrease in admissions over time at -1.0 per month (95% CI: -2.1, 0.1). For other mental health diagnoses, return to school was associated with an initial drop and then an increase in admissions over time, slope of 2.2 (95% CI: -0.5, 3.8).

**Conclusion:** The COVID-19 pandemic had an initial impact on admissions for eating disorders and other mental health that attenuated over time. We note differences in the association of return to school on eating disorders compared with other mental health diagnoses.

## 1 **Introduction**

2           The COVID-19 pandemic has drastically impacted the pediatric population.<sup>1</sup> When  
3 schools physically closed and students moved to primarily virtual learning, many children  
4 experienced social isolation from their peers and lost access to school-based mental health  
5 resources.<sup>2</sup> Preliminary research suggests that mental health problems have increased among  
6 children and young adults since the onset of the COVID pandemic, with potential contributors  
7 including social isolation, difficulty accessing mental health resources, the economic recession,  
8 and the stress surrounding a public health crisis.<sup>2,3,4,5</sup> There is emerging evidence from across the  
9 country that school closures had a detrimental impact on the health and wellbeing of adolescents.  
10 Two medical centers from the East Coast and Midwest found an increase in eating disorder  
11 hospital admissions in the months following their states' stay at home orders.<sup>6,7</sup> Other studies  
12 reported a general increase in eating disorder behavior since the start of the pandemic.<sup>8,9,10,11,12,13</sup>  
13 Several hospitals reported increased emergency department mental health visits for pediatric  
14 patients during the later parts of the pandemic compared to before the pandemic.<sup>14,15,16</sup>

15           While several reports have described the initial increase in mental health-associated visits  
16 and admissions, few studies have described the impact of the overall trajectory of the COVID-19  
17 pandemic,<sup>1</sup> nor examined the association of changing pandemic school restrictions and vaccine  
18 availability on pediatric mental health hospital admissions. This study was conducted in Oregon  
19 where around 1500 to 1600 public, private, and charter schools tracked their virtual, hybrid, and  
20 in-person learning statuses. Following statewide school closures in March of 2020, by October  
21 2020, approximately 83% of schools were using a virtual learning model. By the end of the  
22 2020-2021 school year, only around 2% of the schools were virtual, with 61% of schools  
23 reporting hybrid instruction, and 34% reporting in person only.<sup>17</sup> It was not until the start of the

24 2021-2022 school year, that all of Oregon schools returned to a mostly in-person full academic  
25 year.<sup>18</sup> During this same time period, vaccine availability for the 12+ age group was approved for  
26 emergency use authorization (EUA) on May 12<sup>th</sup> 2021.<sup>19</sup> As of August 30, 2021, 52.1% of 12–  
27 17-year-olds in Oregon had received one COVID-19 vaccine.<sup>20</sup> The aim of this study was to  
28 examine how hospital admissions for mental health conditions and eating disorders changed at  
29 both the beginning of the pandemic and the start of the 2021-2020 school year, representing the  
30 first fully in-person school year and a greater return to pre-pandemic normalcy. We also  
31 examined whether there were differences in sex, gender, and racial and ethnic categories among  
32 children admitted for eating disorders and other mental health diagnoses over the course of the  
33 pandemic.

## 34 **Methods**

### 35 *Study design and sample selection*

36 A retrospective chart review of the electronic medical record was conducted at a 150-bed  
37 academic tertiary-care children’s hospital in the Pacific Northwest. We examined all admission  
38 encounters from March 1, 2018, two years before the onset of the COVID-19 pandemic, through  
39 March 31, 2022, for patients 6-20 years of age. Patients could be included more than once in the  
40 study period. Demographic data were abstracted from the medical record. We examined  
41 patients’ self-identified race and ethnicity as well as gender variables. Over the course of the  
42 study, the method used to categorize gender changed in the medical record, leading to a  
43 substantial number of patients with unspecified gender. We also examined biologic sex. This  
44 study was approved by our institutional IRB.

### 45 *Inclusion and exclusion criteria*

46 Patients meeting the following criteria were included in this study: age 6-20 years and  
47 having an International Classification of Diseases, 10<sup>th</sup> revision (ICD-10) code in their electronic  
48 health record for either the primary diagnosis or encounter diagnosis of an eating disorder or  
49 another mental health disorder including major depressive disorder, suicidal ideation, and  
50 intentional self-harm. Please see appendix for full list of ICD-10 codes.

51 We a priori defined children as having an eating disorder admission if they had an eating  
52 disorder ICD-10 code associated with their admission or an ICD-10 code of malnutrition that  
53 was not one of the excluded codes (e.g. Kwashiorkor). Similarly, we defined children as having a  
54 mental health admission if they had any mental health related ICD-10 codes associated with their  
55 admission encounter in the medical record (see appendix).

#### 56 *Statistical analysis*

57 Overall, we stratified the analysis by mental health diagnoses and eating disorder  
58 diagnoses. Descriptive statistics (means and standard deviations, medians and interquartile  
59 ranges, frequencies and percentages) were used to summarize patient characteristics. Group  
60 comparisons for continuous variables were made using one-way ANOVA, and comparisons for  
61 categorical variables using Fisher's exact test. We conducted two interrupted time series (ITS)  
62 analyses: (1) examining the interruption of pandemic related school closures, and (2) examining  
63 the start of the first fully in person school year with vaccines available to adolescents.

64 The first ITS analysis examines the interruption of pandemic related school closures. The  
65 pandemic was assumed to start on April 1, 2020, just after the date of local pandemic-related  
66 school closures. The pre-pandemic period was considered as those hospital admissions between  
67 March 1, 2018 through March 31, 2020. The post-pandemic period includes the first year of  
68 pandemic admissions, April 1, 2020 through March 31, 2021.

69           The second ITS analysis examines whether the return to the fully in person academic year  
70 was associated with a change in hospital admissions. It examined two interruptions and three  
71 time periods: pre-pandemic period (March 1, 2018 to March 31, 2020); the pandemic school  
72 closure interruption (April 1, 2020); the pandemic year with school closure, hybrid school  
73 models, and some return to in-person learning (April 1, 2020 to August 31, 2021); the return to  
74 the fully in-person school year interruption (September 1, 2021); and the full school year return  
75 to in-person learning (September 1, 2021 to March 31, 2022). All analyses used R: A Language  
76 and Environment for Statistical Computing.<sup>21</sup> A  $p$ -value  $< 0.05$  was defined as statistically  
77 significant.

## 78 **Results**

### 79 *All hospital admissions*

80           All admitted patients from March 1, 2018 through March 31, 2022 can be seen in Figure  
81 1. Before the pandemic, there were an average of 261.7 admissions per month (95% CI: 248.6,  
82 274.8) with a stable slope over time of -0.5 admissions per month (95% CI: -1.7, 0.7;  $p=0.44$ ).  
83 Starting April 1, 2020 there was a decrease in all admissions by -60.3 admissions (95% CI: -27.2,  
84 -93.4;  $p<0.001$ ). Subsequently, the rate of admissions per month increased during the pandemic  
85 by 4.5 admissions per month (95% CI: 0.4, 8.5;  $p<0.001$ ). On September 1, 2021, with the return  
86 to in-person learning, the number of admissions did not substantially change ( $p=0.60$ ), and there  
87 was no change in the slope of admissions per month after that period ( $p=0.24$ ) (Figure 1b). In  
88 summary, for all hospitalizations, we observed a decrease in admission numbers at the start of  
89 the pandemic, and then a slow rise in admission rate throughout the course of the pandemic  
90 lockdown and virtual to hybrid school period with no change in admission rate associated with  
91 the return to in person learning.

92 *Patient Characteristics:*

93           Between March 1, 2018 and March 31, 2022, there were a total of 851 patients who were  
94 admitted with a primary or secondary ICD-10 code for an eating disorder. During this same time  
95 period, there were 1,506 patients admitted with a mental health primary or secondary ICD-10  
96 code. Patient characteristics can be found in Table 1. There was a relative increase in youth  
97 admitted with female sex for eating disorders after the onset of the pandemic (Table 1). An  
98 increase in the proportion of admissions for patients with a transgender or other gender was  
99 noted in the first part of the pandemic, increasing from 2.6% to 3.3% from April 1, 2020 through  
100 August 31, 2021, and then back down to 2.4% in the final period after return to school. For other  
101 mental health diagnoses, we saw a similar increase from 2.6% pre-pandemic to 4.2% during the  
102 April 1, 2020 through August 31, 2021 time frame, and a subsequent decrease to 1.6% post  
103 September 1, 2021. The proportion of those reporting Hispanic ethnicity decreased in both  
104 groups over time, as missing ethnicity data increased.

105 *Statistical Model:*

106           In the ITS analysis examining the effect of the pandemic interruption on April 1, 2020  
107 and the subsequent year of admissions data, we modeled admissions separately for eating  
108 disorders (Figure 2) and other mental health diagnoses (Figure 3). The figures show the observed  
109 trend from the ITS models and the predicted trend had the pre-pandemic trends continued.

110 *Eating disorder admissions:*

111           For eating disorders, prior to the COVID-19 pandemic (prior to April 1, 2020), the  
112 average number of admissions per month was estimated to be 20.6 (95% CI: 15.9, 25.4). The rate  
113 of admissions per month was stable over time with a slope of 0.1 admissions per month (95% CI:  
114 -0.3, 0.5;  $p=0.588$ ) (Figure 2).

115 On April 1, 2020, the number of eating disorder admissions showed a non-significant  
116 decrease of -7.0 (95% CI: -16.3, 2.3;  $p=0.142$ ) admissions. The number of eating disorder  
117 admissions per month then increased over time during the first year of the pandemic with a slope  
118 of 1.2 (95% CI: 0.2, 2.2;  $p=0.020$ ) admissions per month (Figure 2a).

119 The second set of ITS models (Figure 2b) included admissions over a longer time period  
120 and a second interruption on September 1, 2021, symbolizing time of increased socialization due  
121 to opening of more in-person school and increasing immunization rates. In examining the longer  
122 time period in this model, the number of admissions per month stayed the same during the  
123 pandemic with a slope of 0.3 admissions per month (95% CI: -0.4, 1.1;  $p=0.376$ ). At the second  
124 interruption (September 1, 2021), the number of admissions remained stable at an estimated 0.3  
125 admissions per month (95% CI: -14.2, 13.6;  $p=0.968$ ). From September 1, 2021 through March  
126 31, 2022, the number of admissions per month decreased slightly over time with a slope of -1.0  
127 admissions per month (95% CI: -2.1, 0.1;  $p=0.072$ ) without statistical significance (Figure 2b).

128 *Other mental health admissions:*

129 For other mental health diagnoses (Figure 3), prior to the COVID-19 pandemic, the  
130 average number of admissions per month was 35.4 (95% CI: 31.3, 39.5). The rate of admissions  
131 per month was stable over time with a slope of 0.2 admissions per month (95% CI: -0.1, 0.5;  
132  $p=0.13$ ).

133 At the first interruption on April 1, 2020, the number of mental health admissions  
134 decreased by 15.8 admissions (95% CI: 9.7, 21.9;  $p<0.001$ ) (Figure 3a). Subsequently, the  
135 number of mental health admissions per month increased over time during the first year of the  
136 pandemic with a slope of 1.9 more admissions per month (95% CI: 1.1, 2.7;  $p<0.001$ ).



137           Looking at the longer period of time of 18 months in the second ITS model (Figure 3b),  
138 the number of mental health admissions per month stayed the same over time during the  
139 pandemic with a slope of 0.4 admissions per month (95% CI: -0.5, 1.4; p=0.384). Using  
140 September 1, 2021 as the second interruption, the number of admissions decreased by -16.9  
141 (95% CI: -26.5, -7.3; p<0.001). Subsequently, the number of admissions per month showed an  
142 increase with a slope of 2.2 admissions per month (95% CI: -0.5, 3.8; p=0.012).

### 143 **Discussion**

144           The COVID-19 pandemic has had a significant impact on youth mental health.<sup>1</sup> This  
145 study sought to determine impact at the level of hospitalizations at an urban tertiary care  
146 children's hospital with a relationship to mental health etiologies including suicidality,  
147 depression, anxiety disorders, and medical stabilization for disordered eating. After the initial  
148 drop in admissions associated with the pandemic stay at home orders, the rate of both eating  
149 disorder and other mental health admissions significantly increased over the course of the first  
150 year of the pandemic, consistent with other reports.<sup>6,7</sup> However, overall admissions over the  
151 longer course of the pandemic were stable compared to prior. Following the return to mostly in-  
152 person school with vaccines widely available in Oregon, we observed an initial decrease in  
153 mental health admissions suggesting that improved social interactions and possible perceived  
154 community safety related to increased immunization rates in youth may have acutely improved  
155 youth mental health. The significance in increased mental health admissions in the 2021 Fall and  
156 Winter months may reflect annual trends in depression, seasonal changes, or Omicron COVID-  
157 19 variant emergence in November of 2021.<sup>22</sup> While these ecologic associations between major  
158 societal shifts and changes in admissions to hospitals have inherent epidemiological weaknesses

159 in terms of causality, they can provide some insights into the effects associated with such  
160 changes.

161 The relative short-term increase in hospital admissions for disordered eating in the first  
162 year of the pandemic may be attributed to many factors, including the toll of pandemic stress and  
163 the changes in schooling on pediatric eating disorder health.<sup>23,24</sup> Times of change or transition  
164 are associated with increases in and onset of eating disorders in adolescents.<sup>25</sup> These findings are  
165 consistent with other studies demonstrating an increase in hospital admissions for eating  
166 disorders,<sup>6,7,13</sup> increase in eating disorder behaviors,<sup>8,9,10,11</sup> and increase in eating disorder  
167 disease severity<sup>12</sup> during the pandemic worldwide.

168 After lockdown, we observed a relative and short-term increase in admissions for both  
169 patients with eating disorders and other mental health diagnoses compared to the predicted  
170 hospitalization rate before the lockdown, similar to other interrupted time series on eating  
171 disorders hospital admissions before and during the pandemic.<sup>6,7</sup> One possible explanation for  
172 this temporary increase in admissions includes the loss of school resources and structure for the  
173 pediatric patient population. It has been reported that of adolescents who use mental health  
174 services in a year, 57% used a school based mental health service and 35% accessed their mental  
175 health care exclusively from a school.<sup>2</sup> Disruption of routines and peer connections, exposure to  
176 increased stress or abuse at home, and increased social media usage could also be contributors to  
177 increasing rates of admissions.<sup>3</sup>

178 Of interest is our finding that the return to school may have been associated with  
179 differential effects between eating disorders and other mental health admissions. While there are  
180 likely varied and multifactorial explanations for this finding, we hypothesize that the social  
181 isolation of school closure had variable impact on the two different patient populations. While

182 there was lack of access to mental health resources through schools, it is possible that increased  
183 time spent with family units was in fact a protective factor for patients at risk for suicidality, in  
184 the midst of all of the societal stress of the pandemic.<sup>26,27</sup> For adolescents with disordered eating,  
185 we hypothesize that more time spent in the home and with parent(s) could have led to higher  
186 awareness of the adolescents' disordered eating behaviors that would have otherwise been easier  
187 to hide while at school. One other factor to consider with adolescents no longer being around  
188 peers in the school setting is the possibility that they experienced less bullying- which might  
189 have been a protective feature for all students.<sup>27</sup> In addition, Oregon experienced one of the  
190 lowest COVID-19 infection rates per 100,000 citizens in the United States, and it is possible the  
191 stress of the pandemic did not affect Oregon's pediatric psychiatric and eating disorder patient  
192 population as greatly as other states.<sup>28,29</sup> There is a studied seasonality of pediatric mental health  
193 with increasing numbers of emergency department mental health presentations during the fall  
194 and spring and decreasing numbers during the summer.<sup>30,31</sup> The hospital admissions greatly  
195 decreased in July with a slow increase towards September, consistent with the observed  
196 seasonality pattern of pediatric mental health. The level change also could be that after a  
197 complete lack of in-person school, returning to the classroom briefly improved pediatric mental  
198 health before the stresses of school contributed to increased hospital admissions.

199 We observed a slight increase in transgender patients admitted for both mental health and  
200 eating disorders in the pandemic period which may reflect increases in transgender identity  
201 among youth, which has been described recently using CDC data.<sup>32</sup> However, this population  
202 also experiences discrimination and stress at baseline and may have been disproportionately  
203 impacted by the stressors of the pandemic. Given that only one third of transgender youth live in

204 home with family acceptance,<sup>33,34</sup> the extended school closures in Oregon may have been a  
205 particular challenge for these youth, in addition to increased barriers to transgender care.

206 Anecdotally, the severity of pediatric mental health and eating disorder admissions  
207 increased since April 2020. Need for complex care plans, psychiatry, psychology, and 1:1  
208 observation safety needs were higher than normal. Changes to medical unit security and safety  
209 plans were reassessed frequently and dedicated nursing staff were called on to develop de-  
210 escalation plans to keep patients and staff protected. Those with disordered eating diagnoses  
211 were noted to have more significant bradycardia than had been experienced in the years prior in  
212 many cases, and patients reported more severe symptoms temporal to the onset of pandemic  
213 isolation (personal communication, medical director of acute care unit).

214 *Limitations:*

215 This study has some inherent limitations including examining ecological level changes  
216 and examining changes in admissions associated with those changes. Additionally, chart review  
217 of ICD-10 codes tied to a patient admission is complex. Codes are assigned based on many  
218 system and billing provider structures. For example, a patient being admitted is assigned a code,  
219 each consulting and primary billing provider assigns diagnostic codes to their visit each day, and  
220 there is a discharge diagnosis finally assigned. We were inclusive in examining the number of  
221 patients with an eating disorder, for example, by including all malnutrition diagnostic codes. This  
222 methodology may have included some patients with malnutrition without eating disorders.

223 *Conclusion:*

224 This study adds new information on the impact of the COVID-19 pandemic on children's  
225 mental health using a period of two years of hospital admissions data post-pandemic start,  
226 highlighting both the initial increases observed in other studies but also importantly the

227 association with return to in-person school. The COVID-19 pandemic highlighted many pre-  
228 existing challenges within our healthcare system— caring for patients with mental health crises  
229 and eating disorder diagnoses within a medical model of care is one of them.

## References

1. General O of the S. U.S. Surgeon General Issues Advisory on Youth Mental Health Crisis Further Exposed by COVID-19 Pandemic. HHS.gov. Published December 7, 2021. Accessed March 2, 2022. <https://www.hhs.gov/about/news/2021/12/07/us-surgeon-general-issues-advisory-on-youth-mental-health-crisis-further-exposed-by-covid-19-pandemic.html>
2. Golberstein E, Wen H, Miller BF. Coronavirus Disease 2019 (COVID-19) and Mental Health for Children and Adolescents. *JAMA Pediatrics*. 2020;174(9):819-820. doi:10.1001/jamapediatrics.2020.1456
3. Marques de Miranda D, da Silva Athanasio B, Sena Oliveira AC, Simoes-e-Silva AC. How is COVID-19 pandemic impacting mental health of children and adolescents? *International Journal of Disaster Risk Reduction*. 2020;51:101845. doi:10.1016/j.ijdr.2020.101845
4. Meherali S, Punjani N, Louie-Poon S, et al. Mental Health of Children and Adolescents Amidst COVID-19 and Past Pandemics: A Rapid Systematic Review. *Int J Environ Res Public Health*. 2021;18(7):3432. doi:10.3390/ijerph18073432
5. Mayne SL, Hannan C, Davis M, et al. COVID-19 and Adolescent Depression and Suicide Risk Screening Outcomes. *Pediatrics*. Published online June 17, 2021:e2021051507. doi:10.1542/peds.2021-051507
6. Otto AK, Jary JM, Sturza J, et al. Medical Admissions Among Adolescents With Eating Disorders During the COVID-19 Pandemic. *Pediatrics*. Published online July 8, 2021:e2021052201. doi:10.1542/peds.2021-052201
7. Lin JA, Hartman-Munick SM, Kells MR, et al. The Impact of the COVID-19 Pandemic on the Number of Adolescents/Young Adults Seeking Eating Disorder-Related Care. *Journal of Adolescent Health*. Published online July 2021:S1054139X21002792. doi:10.1016/j.jadohealth.2021.05.019
8. Phillipou A, Meyer D, Neill E, et al. Eating and exercise behaviors in eating disorders and the general population during the COVID-19 pandemic in Australia: Initial results from the COLLATE project. *International Journal of Eating Disorders*. 2020;53(7):1158-1165. doi:<https://doi.org/10.1002/eat.23317>
9. Castellini G, Cassioli E, Rossi E, et al. The impact of COVID-19 epidemic on eating disorders: A longitudinal observation of pre versus post psychopathological features in a sample of patients with eating disorders and a group of healthy controls. *Int J Eat Disord*. 2020;53(11):1855-1862. doi:10.1002/eat.23368
10. Vitagliano JA, Jhe G, Milliren CE, et al. COVID-19 and eating disorder and mental health concerns in patients with eating disorders. *J Eat Disord*. 2021;9(1):80. doi:10.1186/s40337-021-00437-1

11. Termorshuizen JD, Watson HJ, Thornton LM, et al. Early impact of COVID-19 on individuals with self-reported eating disorders: A survey of ~1,000 individuals in the United States and the Netherlands. *Int J Eat Disord*. 2020;53(11):1780-1790. doi:10.1002/eat.23353
12. Springall G, Cheung M, Sawyer SM, Yeo M. Impact of the coronavirus pandemic on anorexia nervosa and atypical anorexia nervosa presentations to an Australian tertiary paediatric hospital. *J Paediatr Child Health*. Published online September 27, 2021. doi:10.1111/jpc.15755
13. Agostino H, Burstein B, Moubayed D, et al. Trends in the Incidence of New-Onset Anorexia Nervosa and Atypical Anorexia Nervosa Among Youth During the COVID-19 Pandemic in Canada. *JAMA Netw Open*. 2021;4(12):e2137395. doi:10.1001/jamanetworkopen.2021.37395
14. Haripersad YV, Kannegiesser-Bailey M, Morton K, et al. Outbreak of anorexia nervosa admissions during the COVID-19 pandemic. *Arch Dis Child*. 2021;106(3):e15-e15. doi:10.1136/archdischild-2020-319868
15. Radhakrishnan L. Pediatric Emergency Department Visits Associated with Mental Health Conditions Before and During the COVID-19 Pandemic — United States, January 2019–January 2022. *MMWR Morb Mortal Wkly Rep*. 2022;71. doi:10.15585/mmwr.mm7108e2
16. Hill RM, Rufino K, Kurian S, Saxena J, Saxena K, Williams L. Suicide Ideation and Attempts in a Pediatric Emergency Department Before and During COVID-19. *Pediatrics*. 2021;147(3):e2020029280. doi:10.1542/peds.2020-029280
17. Oregon Department of Education: Health, Safety & Wellness: State of Oregon, 2020-21 School Status. Accessed May 21, 2023. <https://www.oregon.gov/ode/students-and-family/healthsafety/Pages/2020-21-School-Status.aspx>
18. Oregon Department of Education: Health, Safety & Wellness: State of Oregon, Planning for the 2020-21 School Year. Accessed May 21, 2023. <https://www.oregon.gov/ode/students-and-family/healthsafety/pages/planning-for-the-2020-21-school-year.aspx>
19. Children and COVID-19 Vaccinations Trends: AAP Analysis of Data Posted by the Centers for Disease Control and Prevention. Presented at: American Academy of Pediatrics; January 4, 2023. [https://downloads.aap.org/AAP/PDF/Child%20Vaccinations%20Report%20US%20Cumulative%20and%20Weekly%201.4.2023%20edits.pdf?\\_ga=2.261804557.1497222321.1676950142-1546576798.1676950142](https://downloads.aap.org/AAP/PDF/Child%20Vaccinations%20Report%20US%20Cumulative%20and%20Weekly%201.4.2023%20edits.pdf?_ga=2.261804557.1497222321.1676950142-1546576798.1676950142)
20. Oregon COVID-19 Vaccine Effort Metrics. Tableau Software. Accessed March 18, 2023. [https://public.tableau.com/views/OregonCOVID-19VaccineEffortMetrics/RaceandEthnicityData?%3Adisplay\\_static\\_image=y%3AbootstrapWhenNotified=true%3Aembed=true%3Alanguage=en-US&:embed=y&:showVizHome=n&:apiID=host0#navType=0&navSrc=Parse](https://public.tableau.com/views/OregonCOVID-19VaccineEffortMetrics/RaceandEthnicityData?%3Adisplay_static_image=y%3AbootstrapWhenNotified=true%3Aembed=true%3Alanguage=en-US&:embed=y&:showVizHome=n&:apiID=host0#navType=0&navSrc=Parse)

21. R: The R Project for Statistical Computing. Accessed August 6, 2022. <https://www.r-project.org/>
22. Coronavirus Disease 2019 (COVID-19). Centers for Disease Control and Prevention. Published February 11, 2020. Accessed May 21, 2023. <https://www.cdc.gov/coronavirus/2019-ncov/variants/index.html>
23. Sanzari CM, Liu RT. Temporal Trends in Treatment Utilization for Disordered Eating in U.S. Adolescents From 2004 Through 2017: A Nationally Representative Study. *J Adolesc Health*. 2019;65(4):564-566. doi:10.1016/j.jadohealth.2019.05.005
24. Kessler RC, Avenevoli S, Costello EJ, et al. Prevalence, persistence, and sociodemographic correlates of DSM-IV disorders in the National Comorbidity Survey Replication Adolescent Supplement. *Arch Gen Psychiatry*. 2012;69(4):372-380. doi:10.1001/archgenpsychiatry.2011.160
25. Berge JM, Loth K, Hanson C, Croll-Lampert J, Neumark-Sztainer D. Family life cycle transitions and the onset of eating disorders: a retrospective grounded theory approach. *J Clin Nurs*. 2012;21(9-10):1355-1363. doi:10.1111/j.1365-2702.2011.03762.x
26. Janiri D, Doucet GE, Pompili M, et al. Risk and protective factors for childhood suicidality: a US population-based study. *Lancet Psychiatry*. 2020;7(4):317-326. doi:10.1016/S2215-0366(20)30049-3
27. Ati NAL, Paraswati MD, Windarwati HD. What are the risk factors and protective factors of suicidal behavior in adolescents? A systematic review. *J Child Adolesc Psychiatr Nurs*. 2021;34(1):7-18. doi:10.1111/jcap.12295
28. CDC. COVID Data Tracker. Centers for Disease Control and Prevention. Published March 28, 2020. Accessed May 21, 2023. <https://covid.cdc.gov/covid-data-tracker>
29. Covid in the U.S.: Latest Maps, Case and Death Counts - The New York Times. Accessed May 21, 2023. <https://www.nytimes.com/interactive/2021/us/covid-cases.html>
30. Copeland JN, Babyak M, Inscoe AB, Maslow GR. Seasonality of Pediatric Mental Health Emergency Department Visits, School, and COVID-19. *Pediatric Emergency Care*. Published online March 15, 2022. doi:10.1097/PEC.0000000000002671
31. Marshall R, Ribbers A, Sheridan D, Johnson KP. Mental Health Diagnoses and Seasonal Trends at a Pediatric Emergency Department and Hospital, 2015–2019. *Hospital Pediatrics*. 2021;11(3):199-206. doi:10.1542/hpeds.2020-000653
32. Herman JL, Flores AR, O’Neill KK. *How Many Adults and Youth Identify as Transgender in the United States?* Williams Institute School of Law UCLA; 2022:25. <https://williamsinstitute.law.ucla.edu/wp-content/uploads/Trans-Pop-Update-Jun-2022.pdf>
33. Bleckmann C, Leyendecker B, Busch J. Sexual and Gender Minorities Facing the Coronavirus Pandemic: A Systematic Review of the Distinctive Psychosocial and Health-



related Impact. *J Homosex*. Published online May 16, 2022:1-22.  
doi:10.1080/00918369.2022.2074335

34. Grante JM, Mottet LA, Tanis J, Harrison J, Herman JL, Keisling M. *Injustice at Every Turn: A Report of the National Transgender Discrimination Survey*. Washington: National Center for Transgender Equality and National Gay and Lesbian Task Force; 2011:220.  
[https://transequality.org/sites/default/files/docs/resources/NTDS\\_Report.pdf](https://transequality.org/sites/default/files/docs/resources/NTDS_Report.pdf)

**Table 1.** Characteristics of patients with admissions in the three time periods examined

| <b>Patients with an eating disorder diagnosis</b> |                      |                                 |                                                     |                                                        |         |
|---------------------------------------------------|----------------------|---------------------------------|-----------------------------------------------------|--------------------------------------------------------|---------|
|                                                   | Overall<br>(n=851)   | Before April 1,<br>2020 (n=425) | April 1, 2020 through<br>August 31, 2021<br>(n=302) | September 1, 2021<br>through March 31,<br>2022 (n=124) | p-value |
| <b>Admission age, years<br/>(mean (SD))</b>       | 14.57 (2.48)         | 14.48 (2.57)                    | 14.63 (2.37)                                        | 14.72 (2.43)                                           | 0.566   |
| <b>Sex (% female)</b>                             | 579 (68.0)           | 272 (64.0)                      | 215 (71.2)                                          | 92 (74.2)                                              | 0.043   |
| <b>Gender identity (%)</b>                        |                      |                                 |                                                     |                                                        | 0.423   |
| Female                                            | 279 (32.8)           | 156 (36.7)                      | 109 (36.1)                                          | 14 (11.3)                                              |         |
| Male                                              | 108 (12.7)           | 64 (15.1)                       | 40 (13.2)                                           | 4 (3.2)                                                |         |
| Transgender and other                             | 24 (2.8)             | 11 (2.6)                        | 10 (3.3)                                            | 3 (2.4)                                                |         |
| Unspecified                                       | 440 (51.7)           | 194 (45.6)                      | 143 (47.4)                                          | 103 (83.1)                                             |         |
| <b>Ethnicity, Race (%)</b>                        |                      |                                 |                                                     |                                                        | 0.062   |
| Hispanic                                          | 105 (12.3)           | 55 (12.9)                       | 38 (12.6)                                           | 12 (9.7)                                               |         |
| Non-Hispanic, White                               | 589 (69.2)           | 312 (73.4)                      | 194 (64.2)                                          | 83 (66.9)                                              |         |
| Non-Hispanic, Black                               | 27 (3.2)             | 10 (2.4)                        | 12 (4.0)                                            | 5 (4.0)                                                |         |
| Non-Hispanic, Asian                               | 29 (3.4)             | 14 (3.3)                        | 12 (4.0)                                            | 3 (2.4)                                                |         |
| Non-Hispanic, Other                               | 19 (2.2)             | 4 (0.9)                         | 8 (2.6)                                             | 7 (5.6)                                                |         |
| Missing                                           | 82 (9.6)             | 30 (7.1)                        | 38 (12.6)                                           | 14 (11.3)                                              |         |
| <b>Length of stay, days<br/>(median [IQR])</b>    | 6.00 [4.00,<br>9.00] | 6.00 [4.00,<br>9.00]            | 6.00 [4.00, 9.00]                                   | 6.00 [4.00, 8.00]                                      | 0.961   |
| <b>Insurance (%)</b>                              |                      |                                 |                                                     |                                                        | 0.088   |
| Medicaid / Medicare                               | 353 (41.5)           | 192 (45.3)                      | 114 (37.7)                                          | 47 (37.9)                                              |         |
| Private                                           | 497 (58.5)           | 232 (54.7)                      | 188 (62.3)                                          | 77 (62.1)                                              |         |
| <b>Patients with a mental health diagnosis</b>    |                      |                                 |                                                     |                                                        |         |
|                                                   | Overall<br>(n=1506)  | Before April 1,<br>2020 (n=815) | April 1, 2020 through<br>August 31, 2021<br>(n=502) | September 1, 2021<br>through March 31,<br>2022 (n=189) | p-value |
| <b>Admission age, years<br/>(mean (SD))</b>       | 13.72 (3.25)         | 13.67 (3.34)                    | 13.69 (3.26)                                        | 14.07 (2.83)                                           | 0.292   |
| <b>Sex (% female)</b>                             | 953 (63.3)           | 500 (61.3)                      | 323 (64.3)                                          | 130 (68.8)                                             | 0.139   |
| <b>Gender identity (%)</b>                        |                      |                                 |                                                     |                                                        | 0.156   |
| Female                                            | 512 (34.0)           | 311 (38.2)                      | 177 (35.3)                                          | 24 (12.7)                                              |         |
| Male                                              | 256 (17.0)           | 163 (20.0)                      | 86 (17.1)                                           | 7 (3.7)                                                |         |
| Transgender and other                             | 45 (3.0)             | 21 (2.6)                        | 21 (4.2)                                            | 3 (1.6)                                                |         |
| Unspecified                                       | 693 (46.0)           | 320 (39.3)                      | 218 (43.4)                                          | 155 (82.0)                                             |         |
| <b>Ethnicity, Race (%)</b>                        |                      |                                 |                                                     |                                                        | 0.373   |
| Hispanic                                          | 248 (16.5)           | 145 (17.8)                      | 80 (15.9)                                           | 23 (12.2)                                              |         |
| Non-Hispanic, White                               | 971 (64.5)           | 540 (66.3)                      | 319 (63.5)                                          | 112 (59.3)                                             |         |
| Non-Hispanic, Black                               | 51 (3.4)             | 27 (3.3)                        | 17 (3.4)                                            | 7 (3.7)                                                |         |
| Non-Hispanic, Asian                               | 38 (2.5)             | 27 (3.3)                        | 5 (1.0)                                             | 6 (3.2)                                                |         |
| Non-Hispanic, Other                               | 41 (2.7)             | 23 (2.8)                        | 12 (2.4)                                            | 6 (3.2)                                                |         |
| Missing                                           | 157 (10.4)           | 53 (6.5)                        | 69 (13.8)                                           | 35 (18.6)                                              |         |

|                                                |                      |                   |                   |                   |       |
|------------------------------------------------|----------------------|-------------------|-------------------|-------------------|-------|
| <b>Length of stay, days<br/>(median [IQR])</b> | 3.00 [2.00,<br>6.00] | 3.00 [2.00, 6.00] | 4.00 [2.00, 7.00] | 3.00 [2.00, 6.00] | 0.188 |
| <b>Insurance (%)</b>                           |                      |                   |                   |                   | 0.209 |
| Medicaid / Medicare                            | 750 (49.9)           | 422 (52.0)        | 241 (48.1)        | 87 (46.0)         |       |
| Private                                        | 752 (50.1)           | 390 (48.0)        | 260 (51.9)        | 102 (54.0)        |       |

IQR = interquartile range; SD = standard deviation; Note that p-values for Fisher's exact tests do not reflect the missing categories

**Figure 1.** a) Graphical representation looking at hospital admissions by eating disorder, other mental health and non-mental health encounters over time and b) Interrupted time series analysis of the same data with onset of the pandemic and return to in-person school examined as interruptions

a) **Encounters by month**

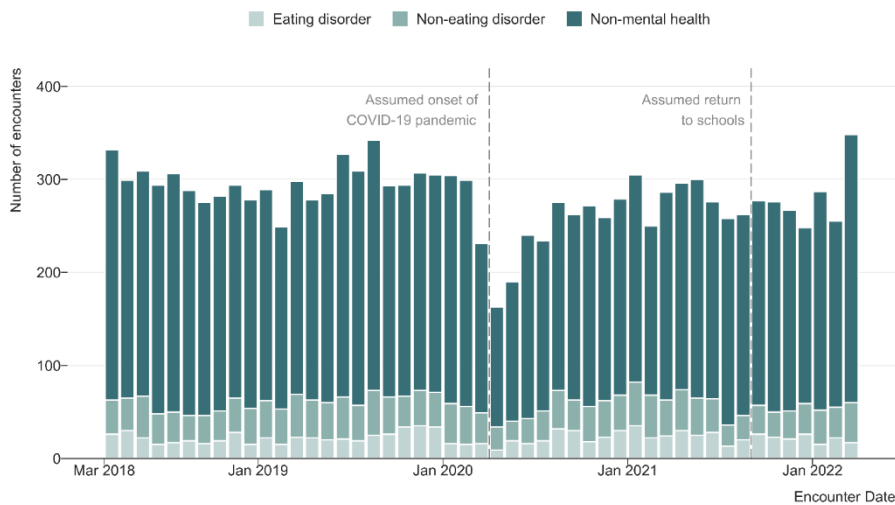

**Effect of COVID-19 pandemic on number of encounters per month**

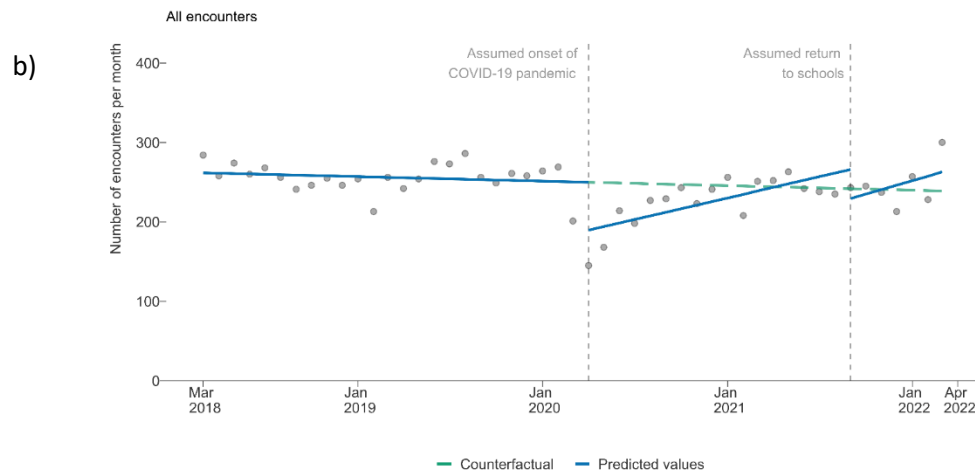

**Figure 2.** Interrupted time series analysis of admissions to the hospital with a diagnosis of eating disorder in a) the first year post-COVID and b) over the longer term (two years)

a) eating disorders in the first year of the pandemic

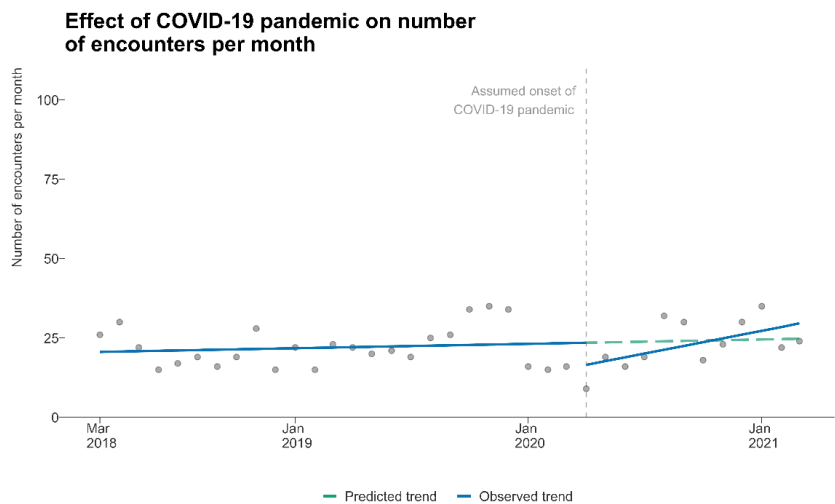

b) eating disorders over the first two years of the pandemic

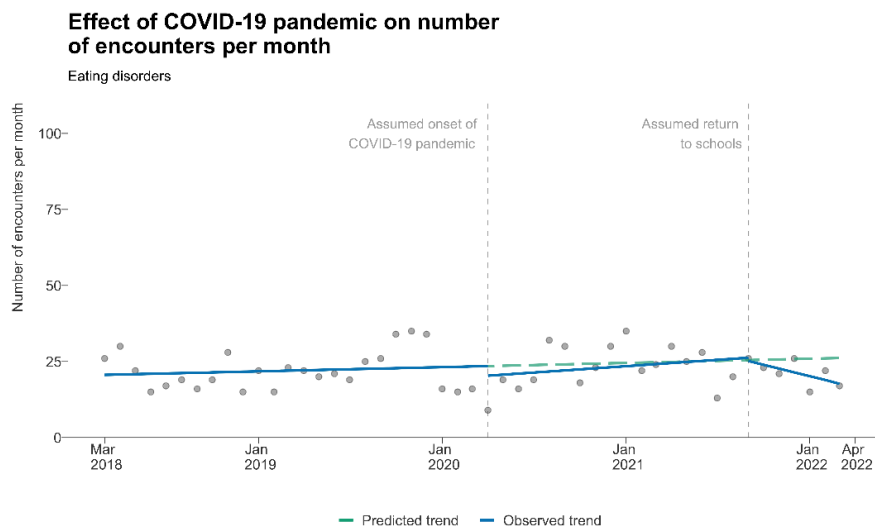

**Figure 3.** Interrupted time series analysis of admissions to the hospital with a diagnosis of other mental health (non-eating disorder) in a) the first year post-COVID and b) over the longer term (two years)

a) Other mental health disorder admissions in the first year of the pandemic

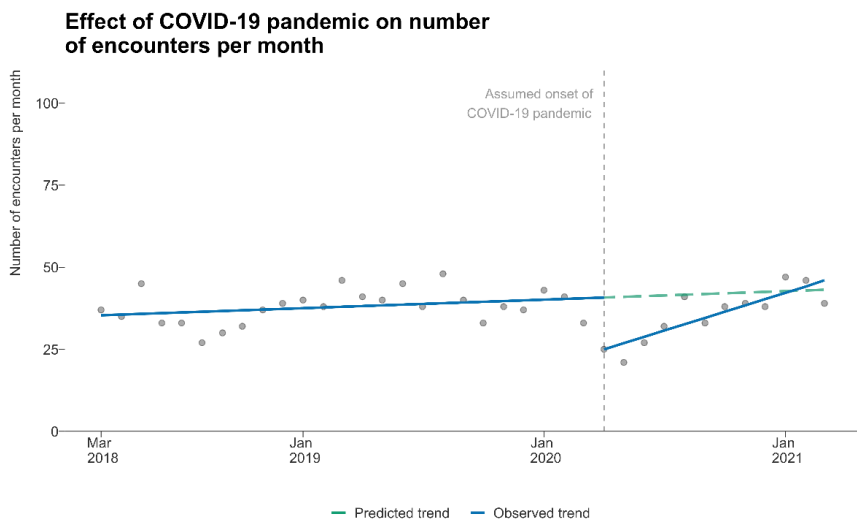

b) Other mental health admissions over the first two years of the pandemic

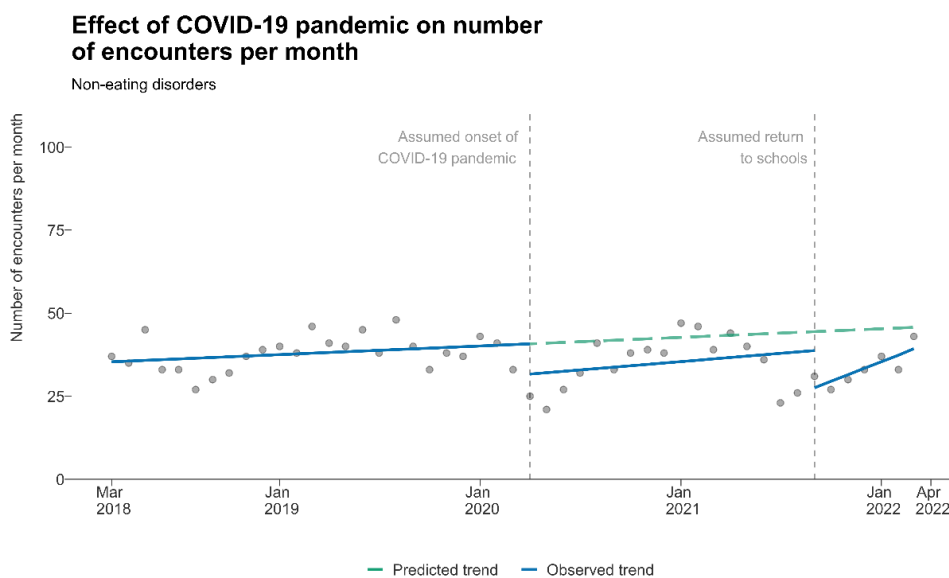

Source: https://medrxiv.org/content/10.1101/2023.07.19.23292841v2.full.pdf
